# Supplementary figures and images for: Internally generated time in the rodent hippocampus is logarithmically compressed
Source: eLife journal article supplement (doi:10.7554/elife.75353), 2022-10-17

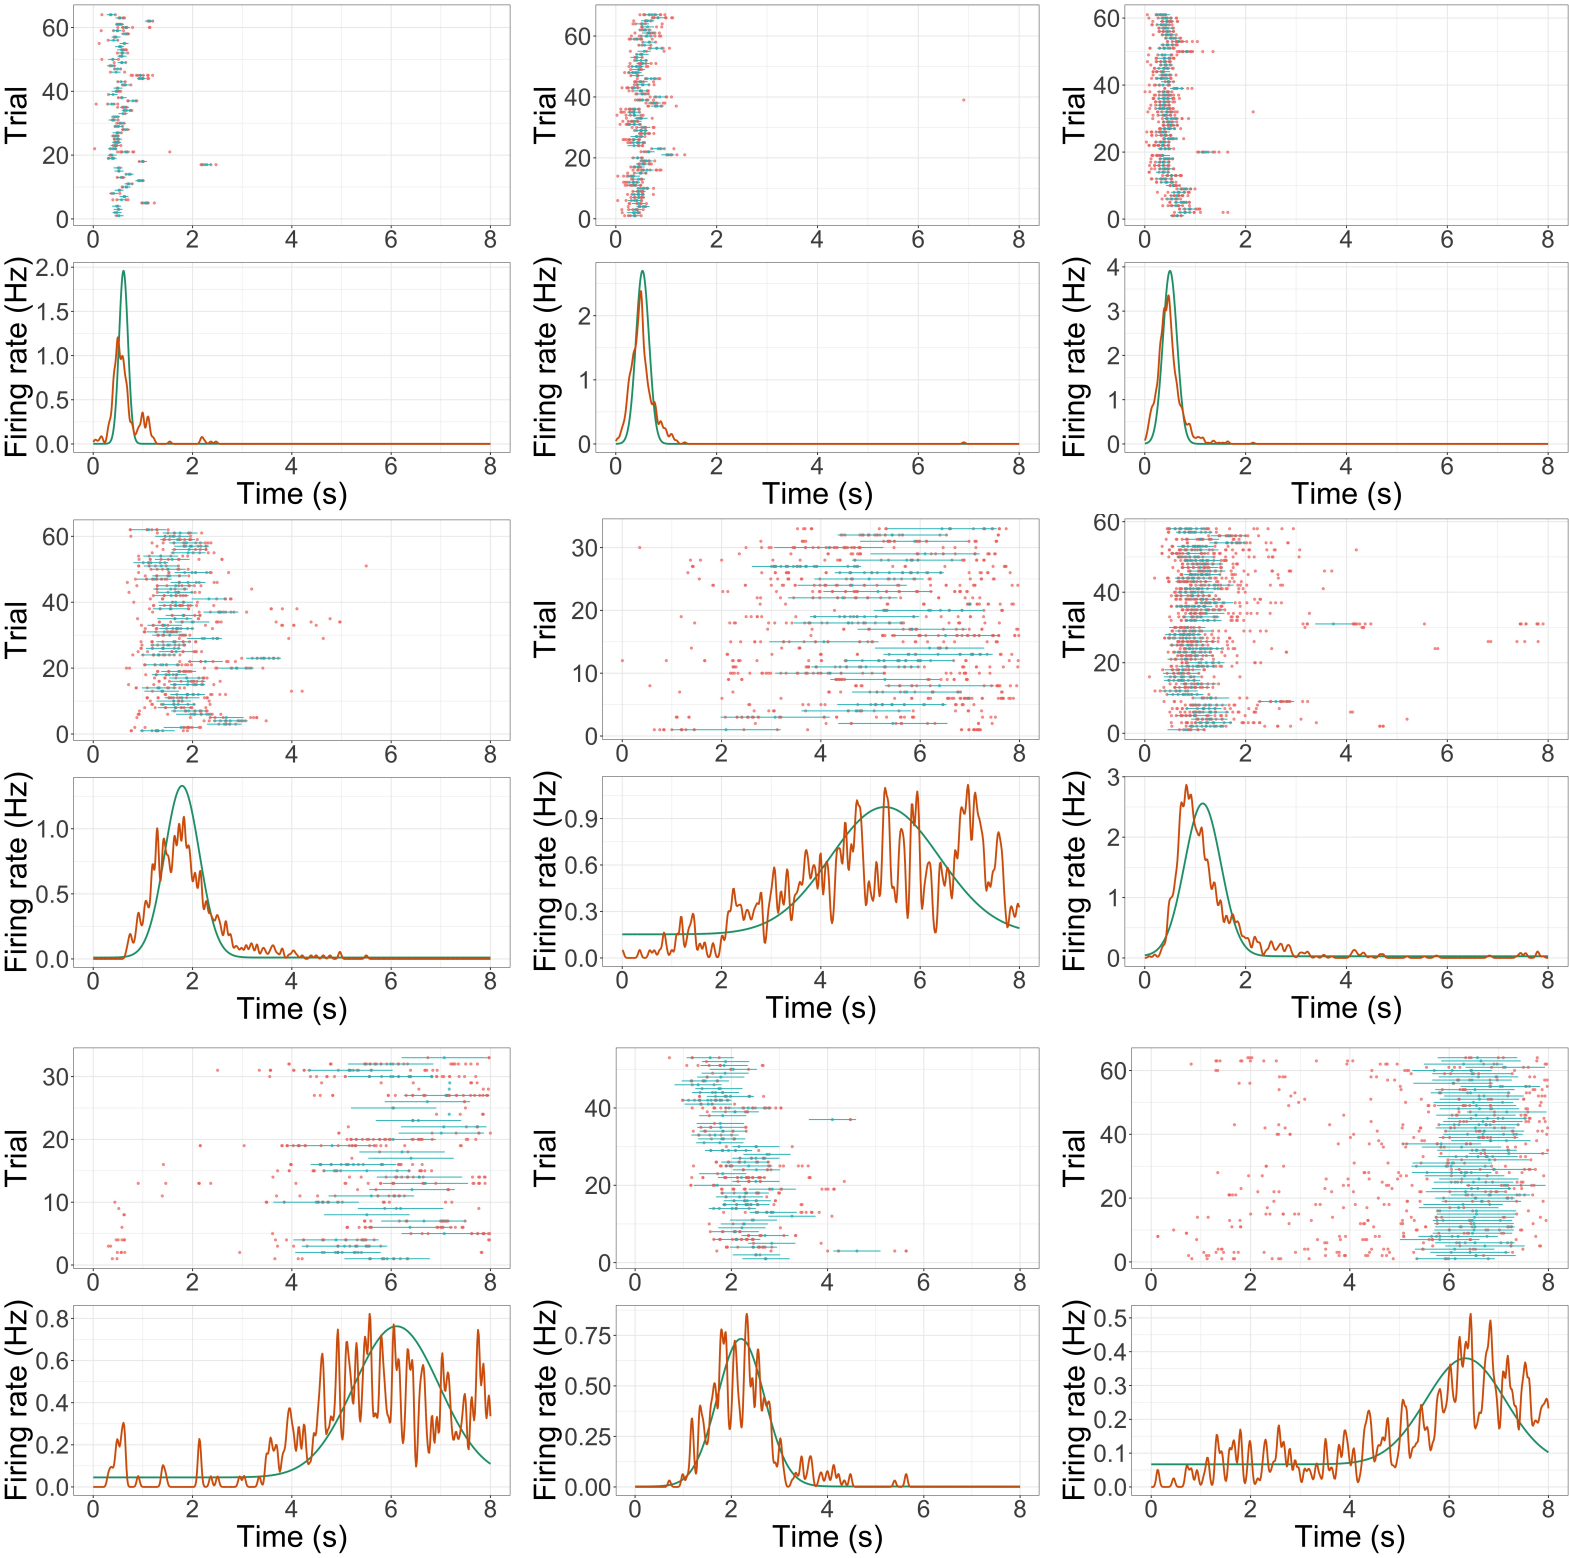

Supplement: supp [file elife-75353-supp-v1.zip]

a

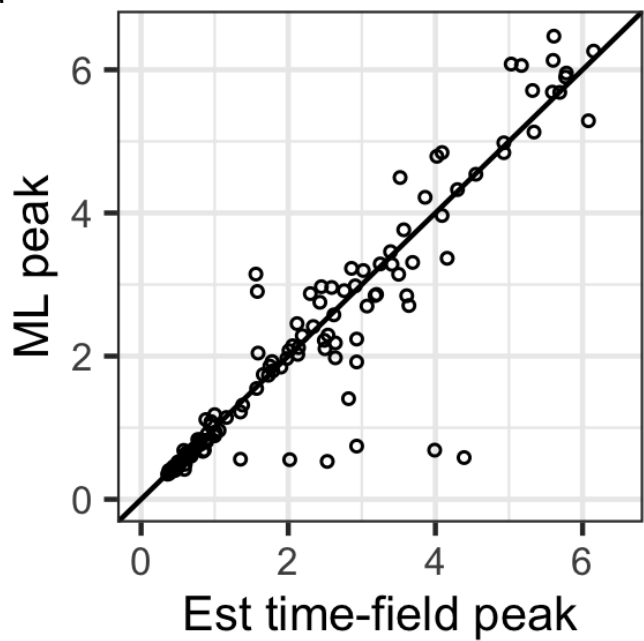

b

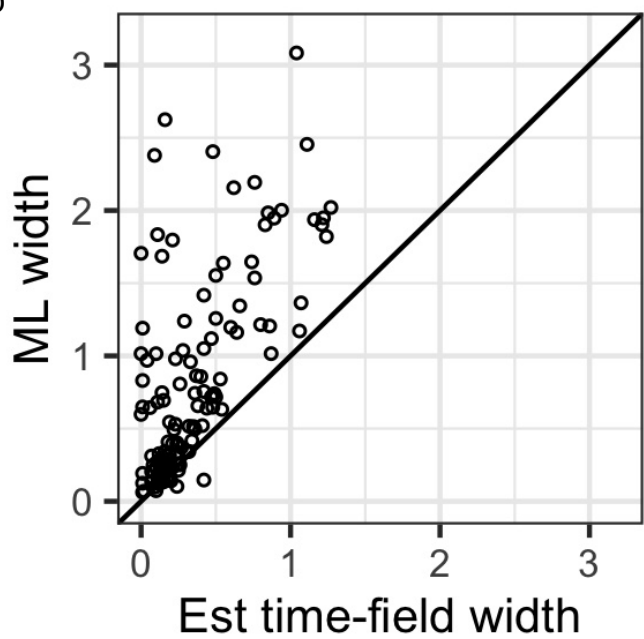

c

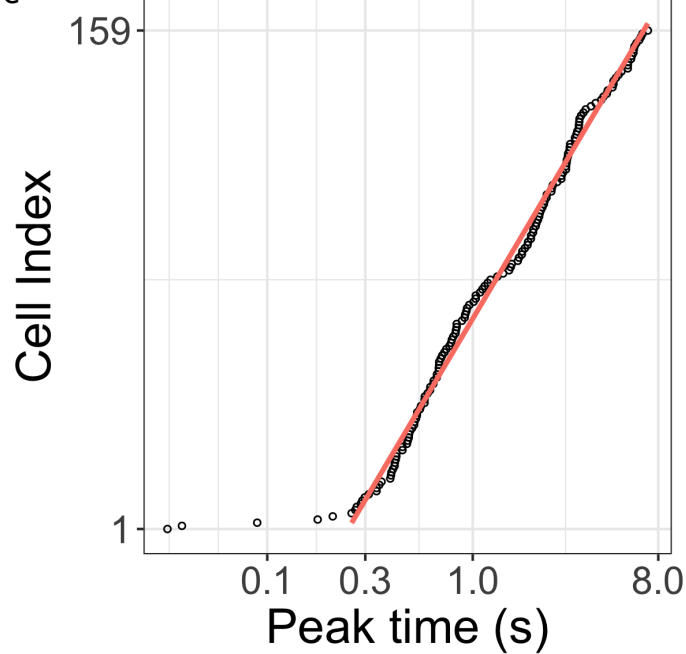

d

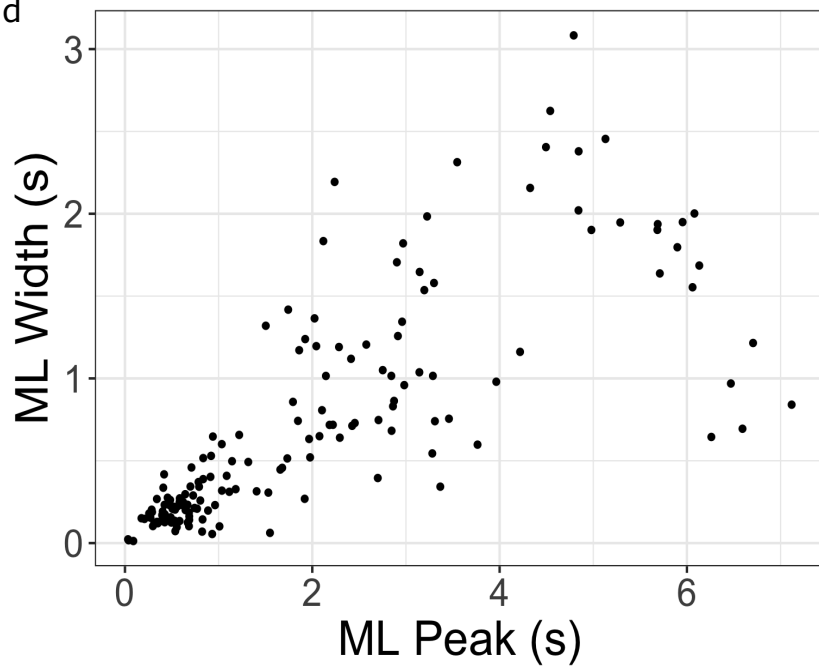

Supplement: supp [file elife-75353-supp-v1.zip]
